# Supplementary material
Source: Springer Nature journal article supplement (http://www.nature.com/nbt/journal/v24/n8/extref/nbt0806-888-S1.pdf)
Supplement: nbt0806-888-S1.pdf [file nbt0806-888-S1.pdf]

**Supplementary Table 1 Selected companies offering genetic tests**

| Company                                                                                | Products                                                                                                                                                                                                                                                                                                                                                                                                                                                                                                                                                                                                                      | Sales channels and funding                                                                                                                         |
|----------------------------------------------------------------------------------------|-------------------------------------------------------------------------------------------------------------------------------------------------------------------------------------------------------------------------------------------------------------------------------------------------------------------------------------------------------------------------------------------------------------------------------------------------------------------------------------------------------------------------------------------------------------------------------------------------------------------------------|----------------------------------------------------------------------------------------------------------------------------------------------------|
| DNA Direct; San Francisco                                                              | Tests for $\alpha$ -1 antitrypsin; blood clotting disorders; breast, ovarian and colon cancer; cystic fibrosis; hemochromatosis; and causes of infertility and recurrent pregnancy loss                                                                                                                                                                                                                                                                                                                                                                                                                                       | Marketed via internet or physician referral; private, venture funded                                                                               |
| Consumer Genetics; Sunnyvale, CA, USA                                                  | Pink or Blue early gender test; tests on caffeine and alcohol metabolism in development                                                                                                                                                                                                                                                                                                                                                                                                                                                                                                                                       | Marketed via internet                                                                                                                              |
| Cygene Direct; Coral Springs, FL, USA                                                  | Athletic DNA Analysis, Thrombosis DNA Analysis, Osteoporosis DNA Analysis, Glaucoma and Macular Degeneration DNA Analysis                                                                                                                                                                                                                                                                                                                                                                                                                                                                                                     | Marketed via internet; publicly traded on OTC                                                                                                      |
| GeneLink/Dermagenetics; Jersey City, NJ, USA                                           | Nutrigenetic Profile (examines SNPs in oxidative stress genes)<br>Dermagenetic Profile (examines SNPs related to increased risk for skin conditions, irritations, wrinkling, oxidative damage, environmental stresses, and photo-aging)<br>DNA UltraCustom Skin Cream (individualized formulas based on genetic information)                                                                                                                                                                                                                                                                                                  | Marketed directly to consumers through partners; skin cream marketed through spas, dermatologists; publicly traded on OTC                          |
| Genova Diagnostics (formerly Great Smokies Diagnostics Laboratory); Asheville, NC, USA | CardioGenomic Profile (SNPs related to blood pressure regulation, lipid balance, nutrient metabolism, inflammation, oxidative stress)<br>OsteoGenomic Profile (SNPs related to collagen synthesis and resorption, inflammation, calcium and vitamin D metabolism)<br>DetoxiGenomic profile (SNPs associated with impaired detoxification, identified people susceptible to adverse drug reactions)<br>Immunogenetic Profile (SNPs related to immune and inflammatory activity, levels and activities of cytokines)<br>NeuroGenomic Profile (SNPs that modulate methylation, glutathione conjugation and oxidative protection) | Marketed through health care providers and supplement distributors                                                                                 |
| GeneCare; Cape Town, South Africa                                                      | Cardiac care (12 genes relating to lipids, folate, homocysteine, iron, thrombosis, hypertension, inflammation), cancer care (multiple genes relating to detoxification, folate uptake, oxidative stress, estrogen exposure), routine genetic tests                                                                                                                                                                                                                                                                                                                                                                            | Company works with dietitians                                                                                                                      |
| Genetic Technologies; Melbourne, Australia                                             | Tests of human sports performance (variants of ACTN3 gene found in fast-twitch muscle), paternity and forensics<br>Disease susceptibility testing through physicians                                                                                                                                                                                                                                                                                                                                                                                                                                                          | Marketed via internet; publicly traded on Australian Stock Exchange and Nasdaq                                                                     |
| GeneLex; Seattle, WA, USA                                                              | Drug reaction testing; tests for genes relating to antidepressant and antipsychotic response, drug interactions (cytochrome P2D6), pain, warfarin, dieting, parentage, ancestry, adverse drug reactions<br>Drug-drug and drug-gene interaction software                                                                                                                                                                                                                                                                                                                                                                       | Marketed via internet, phone and mail                                                                                                              |
| G-nostics; Oxfordshire, UK                                                             | NicoTest (used to determine the preferred method for quitting smoking; measures versions of the dopamine receptor and a cytochrome P450 isoform)                                                                                                                                                                                                                                                                                                                                                                                                                                                                              | Marketed via internet; supported by private equity from Oxford General Partners                                                                    |
| Graceful Earth; Honolulu, HI                                                           | Alzheimer's Genome Test (ApoE)<br>Supplements, hair analysis of people and pets, allergy tests                                                                                                                                                                                                                                                                                                                                                                                                                                                                                                                                | Marketed via internet                                                                                                                              |
| HealthCheck USA; San Antonio, TX, USA                                                  | Tests for celiac disease (PCR of DQ2 alleles of HLA antigen gene), Factor V Leiden plus prothrombin factor II, Factor VR2, hemochromatosis, prothrombin                                                                                                                                                                                                                                                                                                                                                                                                                                                                       | Marketed via internet                                                                                                                              |
| Interleukin Genetics; Waltham, MA, USA                                                 | Periodontal disease test (two IL-1 variants that predispose people to inflammation)<br>Gensona heart health genetic test (IL-1 composite genotype)<br>General nutrition genetic test (2 genes important for vitamin B utilization, 4 genes involved in oxidative stress management)                                                                                                                                                                                                                                                                                                                                           | Sold through Quixtar; publicly traded on AMEX                                                                                                      |
| Kimball Genetics; Denver, CO, USA                                                      | Tests for cardiovascular disease, celiac disease, CF, Fragile X syndrome, hemochromatosis, narcolepsy, periodontal disease                                                                                                                                                                                                                                                                                                                                                                                                                                                                                                    | Sold directly to public, but purchasers must provide name of a physician to receive report (report also goes to patient, except in New York state) |
| MediChecks; Nottingham, UK                                                             | Numerous standard genetic tests; BRCA1/BRCA1 test (by physician referral only)                                                                                                                                                                                                                                                                                                                                                                                                                                                                                                                                                | Marketed via internet                                                                                                                              |
| NeuroMark Genomics; Boulder, CO, USA                                                   | Depression risk test (assays serotonin transporter gene of 5-HTT gene)                                                                                                                                                                                                                                                                                                                                                                                                                                                                                                                                                        | Marketed via internet                                                                                                                              |
| Sciona; Boulder, CO, USA                                                               | Cellf Comprehensive Genetic Assessment Kit (19 genes)<br>Heart Health (12 genes)<br>Bone Health (4 genes)<br>Insulin Resistance (5 genes)<br>Antioxidant and Detoxification (5 genes)<br>Inflammation Health (6 genes)                                                                                                                                                                                                                                                                                                                                                                                                        | Marketed through four retail grocery and pharmacies in the United States and online                                                                |
| Seryx; Montreal, London, Singapore and Cherry Hill, NJ, USA                            | SignatureGenetics database of literature on drug interactions, adverse reactions and lifestyle changes based on genotype                                                                                                                                                                                                                                                                                                                                                                                                                                                                                                      | Marked through membership service with physician                                                                                                   |
| Suracell; Montclair, NJ, USA                                                           | DNA Profile (inherited genetic aging profile and biomarker assessment for DNA damage)<br>Supplements for heart, bone, blood sugar and body fat control, and detoxification and free radical reduction                                                                                                                                                                                                                                                                                                                                                                                                                         | Marketed via internet with supplements                                                                                                             |
| TLC International; South Africa                                                        | Susceptibility tests for heart disease and cancer, with lifestyle and dietary advice                                                                                                                                                                                                                                                                                                                                                                                                                                                                                                                                          | Marketed via internet and TLC's International Lifestyle Clinics                                                                                    |
